# Supplementary material
Source: MDPI journal article supplement (https://www.mdpi.com/2073-4395/14/2/352)
Supplement: s1 [file s1]

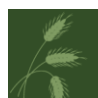

**Table S1.** Soil basic chemical parameters for three contaminated soils.

| parameters                   | Dabao mountain<br>(DBS) | Hulu Island<br>(HD) | Shen Yang<br>(SY) |
|------------------------------|-------------------------|---------------------|-------------------|
| pH                           | 5.51 ± 0.02             | 7.01 ± 0.02         | 7.99 ± 0.01       |
| Organic matter (g/kg)        | 5.60 ± 0.06             | 2.57 ± 0.03         | 5.48 ± 0.05       |
| Total N (g/kg)               | 0.96 ± 0.02             | 1.56 ± 0.01         | 0.96 ± 0.01       |
| Total P (g/kg)               | 1.18 ± 0.01             | 1.16 ± 0.02         | 0.65 ± 0.00       |
| Total K (g/kg)               | 0.87 ± 0.01             | 0.52 ± 0.00         | 0.73 ± 0.01       |
| CEC (c mol <sup>+</sup> /kg) | 3.76 ± 0.10             | 5.50 ± 0.13         | 14.10 ± 0.18      |
| Total Cd (mg/kg)             | 1.69 ± 0.02             | 64.43 ± 1.03        | 1.76 ± 0.02       |
| Total Pb (mg/kg)             | 103.6 ± 0.2             | 252.2 ± 0.8         | 118.7 ± 0.2       |
| Total Fe (g/kg)              | 50.9 ± 0.11             | 17.3 ± 0.03         | 28.3 ± 0.10       |
| Total Mn (g/kg)              | 4.13 ± 0.00             | 0.33 ± 0.01         | 0.46 ± 0.01       |
| Total Al (g/kg)              | 1.06 ± 0.01             | 1.01 ± 0.02         | 4.9 ± 0.01        |
| Sand (2-0.02 mm)             | 73.8 %                  | 77.3 %              | 63.9 %            |
| Silt (0.02-0.002 mm)         | 16.2%                   | 18.2 %              | 29.1 %            |
| Clay (< 0.002 mm)            | 10.0%                   | 4.5 %               | 6.8 %             |

**Table S2.** The Hydrus-1D fitting results of Cd<sup>2+</sup> and Pb<sup>2+</sup> BTCs at different pH and ionic strength.

| Solution                                                                        | pH  | IS    | Smax   | K <sub>a</sub> | K <sub>d</sub> | R <sup>2</sup> |
|---------------------------------------------------------------------------------|-----|-------|--------|----------------|----------------|----------------|
| 100 mg·L <sup>-1</sup> soil colloids                                            | 3.0 | 0.01  |        | NA             |                |                |
|                                                                                 | 5.0 | 0.01  |        | NA             |                |                |
|                                                                                 | 7.0 | 0.01  | 1.8639 | 0.1668         | 9.171E-05      | 0.9943         |
|                                                                                 | 9.0 | 0.01  | 1.2990 | 0.0682         | 1.735E-04      | 0.9820         |
| 10 mg·L <sup>-1</sup> Cd <sup>2+</sup>                                          | 3.0 | 0.01  | 0.9536 | 0.2216         | 5.267E-02      | 0.9981         |
|                                                                                 | 5.0 | 0.01  | 1.5604 | 0.1352         | 9.171E-03      | 0.9840         |
|                                                                                 | 7.0 | 0.01  | 1.9732 | 0.2356         | 3.436E-03      | 0.9620         |
|                                                                                 | 9.0 | 0.01  |        | NA             |                |                |
|                                                                                 | 7.0 | 0     |        | NA             |                |                |
|                                                                                 | 7.0 | 0.005 | 2.8443 | 0.4892         | 5.072E-03      | 0.9958         |
|                                                                                 | 7.0 | 0.05  | 1.5983 | 0.1477         | 2.353E-03      | 0.9046         |
| 10 mg·L <sup>-1</sup> Pb <sup>2+</sup>                                          | 3.0 | 0.01  | 2.2957 | 0.4062         | 3.134E-02      | 0.9926         |
|                                                                                 | 5.0 | 0.01  |        | NA             |                |                |
|                                                                                 | 7.0 | 0.01  |        | NA             |                |                |
|                                                                                 | 9.0 | 0.01  |        | NA             |                |                |
|                                                                                 | 5.0 | 0     |        | NA             |                |                |
|                                                                                 | 5.0 | 0.005 |        | NA             |                |                |
|                                                                                 | 5.0 | 0.05  | 1.7673 | 0.8247         | 3.764E-03      | 0.9055         |
|                                                                                 | 3.0 | 0.01  | 0.7994 | 0.1765         | 4.140E-02      | 0.9978         |
| 100 mg·L <sup>-1</sup> soil colloids<br>+10 mg·L <sup>-1</sup> Cd <sup>2+</sup> | 5.0 | 0.01  | 1.7494 | 0.1368         | 5.454E-03      | 0.9768         |
|                                                                                 | 7.0 | 0.01  | 1.8264 | 0.1427         | 3.850E-03      | 0.9421         |
|                                                                                 | 9.0 | 0.01  | 2.0302 | 0.6290         | 5.326E-03      | 0.9938         |
|                                                                                 | 7.0 | 0     | 1.6568 | 0.1216         | 6.863E-03      | 0.9467         |
|                                                                                 | 7.0 | 0.005 | 1.9362 | 0.1235         | 4.066E-03      | 0.9024         |
|                                                                                 | 7.0 | 0.05  | 6.7009 | 0.0775         | 9.549E-04      | 0.1546         |

|                                         |     |       |        |        |           |        |
|-----------------------------------------|-----|-------|--------|--------|-----------|--------|
|                                         | 3.0 | 0.01  | 2.0721 | 0.3676 | 2.188E-02 | 0.9962 |
| 100 mg·L <sup>-1</sup> soil colloids    | 5.0 | 0.01  |        | NA     |           |        |
| +10 mg·L <sup>-1</sup> Pb <sup>2+</sup> | 7.0 | 0.01  | 2.5670 | 0.4057 | 1.149E-05 | 0.9920 |
| +                                       | 9.0 | 0.01  | 2.1300 | 0.2654 | 1.479E-05 | 0.9968 |
| +                                       | 5.0 | 0     | 1.7088 | 0.3304 | 4.347E-03 | 0.9154 |
|                                         | 5.0 | 0.005 |        | NA     |           |        |
|                                         | 5.0 | 0.05  |        | NA     |           |        |

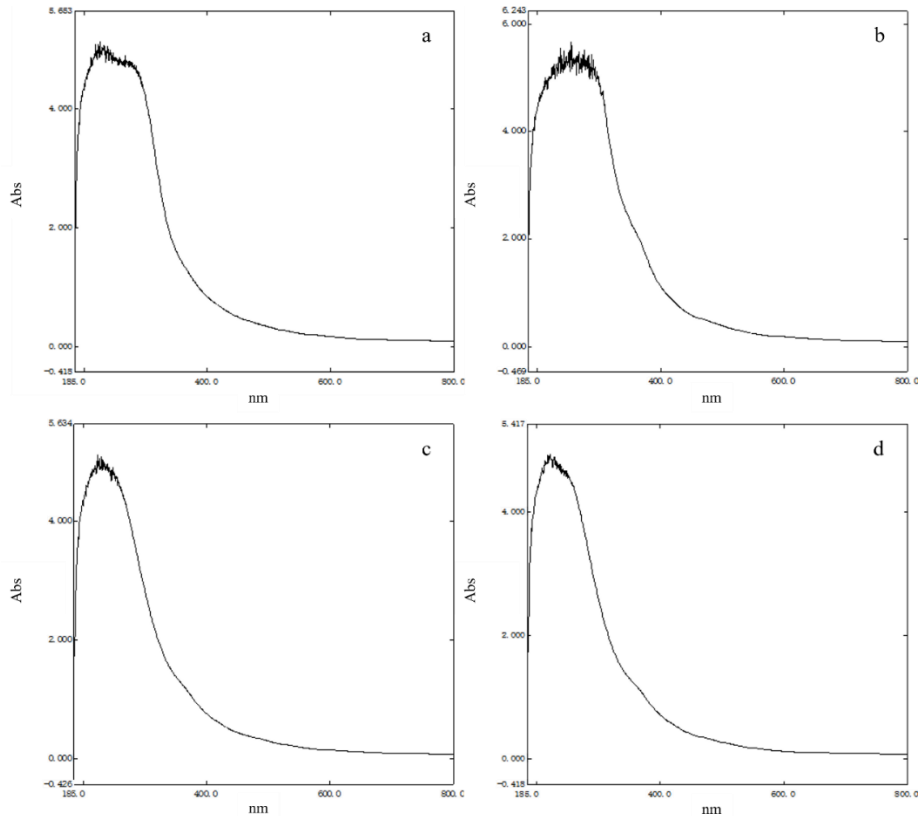

**Figure S1.** UV full wavelength scanning signal graph of soil colloids (a: DBS, pH = 5.5; b: SY, pH = 8.0; c: HD, pH = 7.0; d: HD background, pH = 7.0).

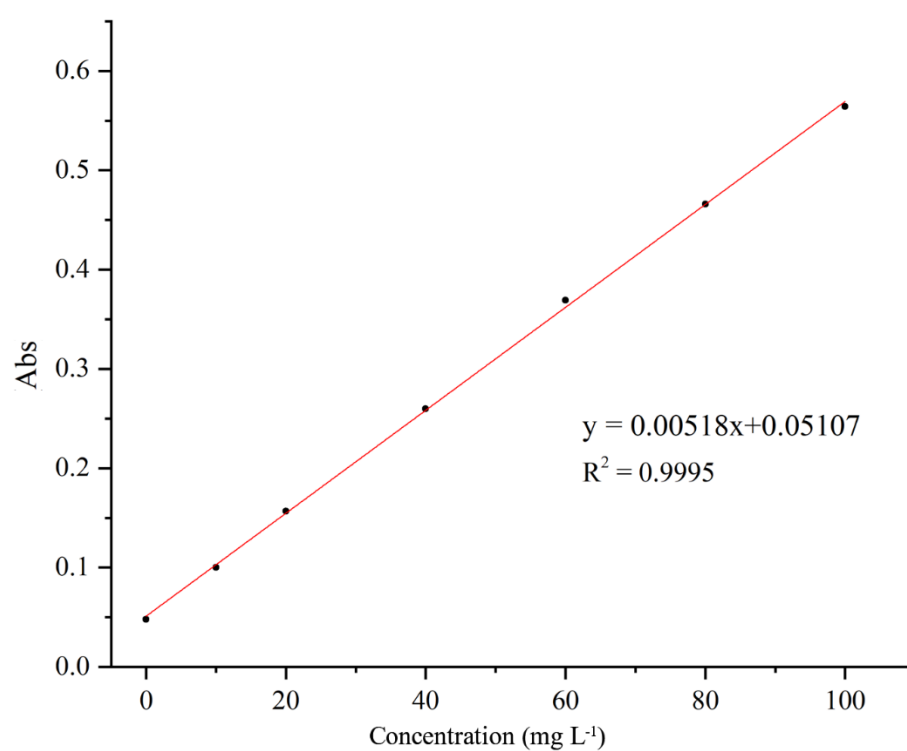

**Figure S2.** Relationship between soil colloid concentration and absorbance at 254 nm.

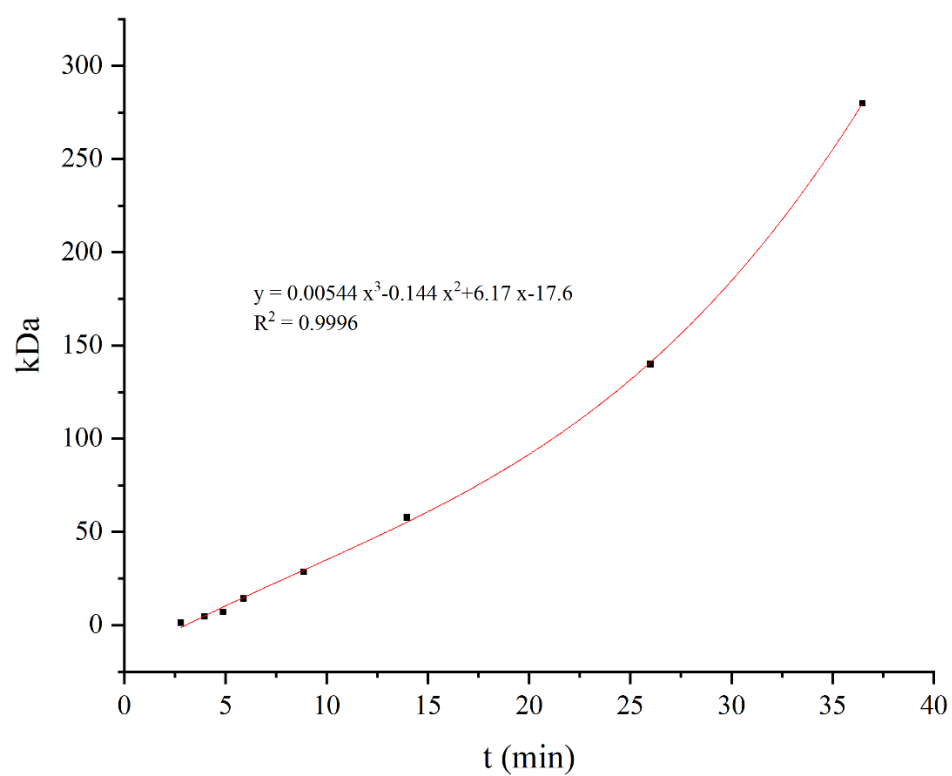

**Figure S3.** Relationship between polystyrene sulfonate standards and elution time.

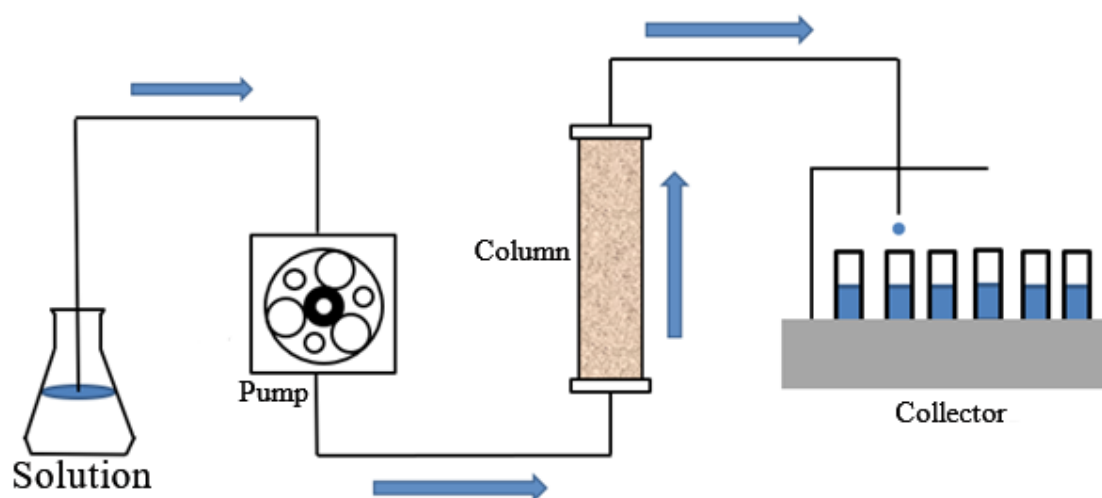

**Figure S4.** Schematic diagram of the experimental equipment for saturated sand column.
